# Supplementary material
Source: ML conference proceedings conference paper supplement (https://proceedings.neurips.cc/paper_files/paper/2013/hash/07cdfd23373b17c6b337251c22b7ea57-Abstract.html)
Supplement: Supplementary file [file 07cdfd23373b17c6b337251c22b7ea57-Supplemental.zip]

---

# Appendix

## A Scalable Approach to Probabilistic Latent Space Inference of Large-Scale Networks

---

### A Details of Stochastic Variational Inference

**Exact form of the variational lower bound.** We adopted a structured mean-field approximation method, in which the true (but intractable) posterior of latent variables  $p(\mathbf{s}, \boldsymbol{\theta}, \mathbf{B} \mid \mathbf{E}, \alpha, \lambda)$  is approximated by a *partially* factorized distribution  $q(\mathbf{s}, \boldsymbol{\theta}, \mathbf{B})$ ,

$$\begin{aligned} q(\mathbf{s}, \boldsymbol{\theta}, \mathbf{B}) &= q(\mathbf{s} \mid \boldsymbol{\phi})q(\boldsymbol{\theta} \mid \boldsymbol{\gamma})q(\mathbf{B} \mid \boldsymbol{\eta}) \\ &= \prod_{(i,j,k) \in I} q(s_{i,jk}, s_{j,ik}, s_{k,ij} \mid \phi_{ijk}) \prod_{i=1}^N q(\theta_i \mid \gamma_i) \prod_{x=1}^K q(B_{xxx} \mid \eta_{xxx}) \prod_{x=1}^K q(B_{xx} \mid \eta_{xx})q(B_0 \mid \eta_0), \end{aligned} \quad (1)$$

where  $I$  is the set of triples with triangular motifs formed:  $I = \{(i, j, k) : i < j < k, E_{ijk} = 1, 2, 3 \text{ or } 4\}$ .  $|I| = O(N\delta^2)$  after  $\delta$ -subsampling.

The variational lower bound of the log marginal likelihood of the triangular motifs based on this variational distribution is

$$\begin{aligned} \log p(\mathbf{E} \mid \alpha, \lambda) &\geq \mathbb{E}_q[\log p(\mathbf{E}, \mathbf{s}, \boldsymbol{\theta}, \mathbf{B} \mid \alpha, \lambda)] - \mathbb{E}_q[\log q(\mathbf{s}, \boldsymbol{\theta}, \mathbf{B})] \doteq \mathcal{L}(\boldsymbol{\phi}, \boldsymbol{\eta}, \boldsymbol{\gamma}) \\ &= \mathbb{E}_q[\log p(B_0 \mid \lambda)] - \mathbb{E}_q[\log q(B_0 \mid \eta_0)] + \sum_{x=1}^K \left\{ \mathbb{E}_q[\log p(B_{xx} \mid \lambda)] - \mathbb{E}_q[\log q(B_{xx} \mid \eta_{xx})] \right\} \\ &+ \sum_{x=1}^K \left\{ \mathbb{E}_q[\log p(B_{xxx} \mid \lambda)] - \mathbb{E}_q[\log q(B_{xxx} \mid \eta_{xxx})] \right\} + \sum_{i=1}^N \left\{ \mathbb{E}_q[\log p(\theta_i \mid \alpha)] - \mathbb{E}_q[\log q(\theta_i \mid \gamma_i)] \right\} \\ &+ \sum_{(i,j,k) \in I} \left\{ \mathbb{E}_q[\log p(s_{i,jk} \mid \theta_i) + \log p(s_{j,ik} \mid \theta_j) + \log p(s_{k,ij} \mid \theta_k)] + \mathbb{E}_q[\log p(E_{ijk} \mid s_{i,jk}, s_{j,ik}, s_{k,ij}, \mathbf{B})] \right\} \\ &- \sum_{(i,j,k) \in I} \mathbb{E}_q[\log q(s_{i,jk}, s_{j,ik}, s_{k,ij} \mid \phi_{ijk})]. \end{aligned} \quad (2)$$

The first two line in (2) is the global term  $g(\boldsymbol{\gamma}, \boldsymbol{\eta})$  that depends only the global variational parameters  $\boldsymbol{\gamma}$  and  $\boldsymbol{\eta}$ , whereas the last two lines is a summation of local term  $\ell(\phi_{ijk}, \boldsymbol{\gamma}, \boldsymbol{\eta})$ , one for each triangular motif.

**Exact local update.** For each sampled triangle  $(i, j, k)$  in a mini-batch, update the  $O(K^3)$  entries of the tensor parameters  $\phi_{ijk}$  as follows and then normalize to have sum equal to one.

- For  $x \in \{1, \dots, K\}$ ,

$$\phi_{ijk}^{xxx} \propto \exp \left\{ \mathbb{E}_q[\log B_{xxx,2}] \mathbb{I}[E_{ijk} = 4] + \mathbb{E}_q[\log(B_{xxx,1}/3)] \mathbb{I}[E_{ijk} \neq 4] + \mathbb{E}_q[\log \theta_{i,x}] + \mathbb{E}_q[\log \theta_{j,x}] + \mathbb{E}_q[\log \theta_{k,x}] \right\}. \quad (3)$$

- For  $x, y \in \{1, \dots, K\}$  and  $x \neq y$ ,

$$\begin{aligned} \phi_{ijk}^{xxy} &\propto \exp \left\{ \mathbb{E}_q[\log B_{xx,3}] \mathbb{I}[E_{ijk} = 4] + \mathbb{E}_q[\log B_{xx,2}] \mathbb{I}[E_{ijk} = 3] + \mathbb{E}_q[\log(B_{xx,1}/2)] \mathbb{I}[E_{ijk} = 1 \text{ or } 2] \right. \\ &\quad \left. + \mathbb{E}_q[\log \theta_{i,x}] + \mathbb{E}_q[\log \theta_{j,x}] + \mathbb{E}_q[\log \theta_{k,x}] \right\}. \end{aligned} \quad (4)$$

- For distinct  $x, y, z \in \{1, \dots, K\}$ ,

$$\phi_{ijk}^{xyz} \propto \exp \left\{ \mathbb{E}_q[\log B_{0,2}] \mathbb{I}[E_{ijk} = 4] + \mathbb{E}_q[\log(B_{0,1}/3)] \mathbb{I}[E_{ijk} \neq 4] + \mathbb{E}_q[\log \theta_{i,x}] + \mathbb{E}_q[\log \theta_{j,x}] + \mathbb{E}_q[\log \theta_{k,x}] \right\}. \quad (5)$$

The update equations for  $\phi_{ijk}^{xyx}$  and  $\phi_{ijk}^{yxx}$  are similar to  $\phi_{ijk}^{xxy}$ , and therefore we omit the details.

**Global update.** The natural gradient  $\tilde{\nabla} \mathcal{L}_S(\boldsymbol{\eta}, \boldsymbol{\gamma})$  with respect to  $\boldsymbol{\eta}$  is

- For  $x \in \{1, \dots, K\}$ ,

$$\tilde{\nabla}_{\eta_{xxx,1}} \mathcal{L}_S(\boldsymbol{\eta}, \boldsymbol{\gamma}) = \lambda + \frac{m}{s} \left[ \sum_{(i,j,k) \in S} q_{ijk}(x, x, x) \mathbb{I}[E_{ijk} \neq 4] \right] - \eta_{xxx,1}, \quad (6)$$

$$\tilde{\nabla}_{\eta_{xxx,2}} \mathcal{L}_S(\boldsymbol{\eta}, \boldsymbol{\gamma}) = \lambda + \frac{m}{s} \left[ \sum_{(i,j,k) \in S} q_{ijk}(x, x, x) \mathbb{I}[E_{ijk} = 4] \right] - \eta_{xxx,2}. \quad (7)$$

- For  $x \in \{1, \dots, K\}$ ,

$$\begin{aligned} \tilde{\nabla}_{\eta_{xx,1}} \mathcal{L}_S(\boldsymbol{\eta}, \boldsymbol{\gamma}) = \lambda + \frac{m}{s} \left[ \sum_{(i,j,k) \in S} \sum_{y: y \neq x} \left( q_{ijk}(x, x, y) \mathbb{I}[E_{ijk} = 1, 2] + q_{ijk}(x, y, x) \mathbb{I}[E_{ijk} = 1, 3] \right. \right. \\ \left. \left. + q_{ijk}(y, x, x) \mathbb{I}[E_{ijk} = 2, 3] \right) \right] - \eta_{xx,1}, \end{aligned} \quad (8)$$

$$\begin{aligned} \tilde{\nabla}_{\eta_{xx,2}} \mathcal{L}_S(\boldsymbol{\eta}, \boldsymbol{\gamma}) = \lambda + \frac{m}{s} \left[ \sum_{(i,j,k) \in S} \sum_{y: y \neq x} \left( q_{ijk}(x, x, y) \mathbb{I}[E_{ijk} = 3] + q_{ijk}(x, y, x) \mathbb{I}[E_{ijk} = 2] \right. \right. \\ \left. \left. + q_{ijk}(y, x, x) \mathbb{I}[E_{ijk} = 1] \right) \right] - \eta_{xx,2}, \end{aligned} \quad (9)$$

$$\tilde{\nabla}_{\eta_{xx,3}} \mathcal{L}_S(\boldsymbol{\eta}, \boldsymbol{\gamma}) = \lambda + \frac{m}{s} \left[ \sum_{(i,j,k) \in S} \sum_{y: y \neq x} \left( q_{ijk}(x, x, y) + q_{ijk}(x, y, x) + q_{ijk}(y, x, x) \right) \mathbb{I}[E_{ijk} = 4] \right] - \eta_{xx,3}. \quad (10)$$

•

$$\tilde{\nabla}_{\eta_{0,1}} \mathcal{L}_S(\boldsymbol{\eta}, \boldsymbol{\gamma}) = \lambda + \frac{m}{s} \left[ \sum_{(i,j,k) \in S} \sum_{(x,y,z): x \neq y \neq z} q_{ijk}(x, y, z) \mathbb{I}[E_{ijk} \neq 4] \right] - \eta_{0,1}, \quad (11)$$

$$\tilde{\nabla}_{\eta_{0,2}} \mathcal{L}_S(\boldsymbol{\eta}, \boldsymbol{\gamma}) = \lambda + \frac{m}{s} \left[ \sum_{(i,j,k) \in S} \sum_{(x,y,z): x \neq y \neq z} q_{ijk}(x, y, z) \mathbb{I}[E_{ijk} = 4] \right] - \eta_{0,2}. \quad (12)$$

The natural gradient  $\tilde{\nabla} \mathcal{L}_S(\boldsymbol{\eta}, \boldsymbol{\gamma})$  with respect to  $\boldsymbol{\gamma}$  is, for each  $i = 1, \dots, N$  and  $x = 1, \dots, K$ ,

$$\tilde{\nabla}_{\gamma_{i,x}} \mathcal{L}_S(\boldsymbol{\eta}, \boldsymbol{\gamma}) = \alpha + \frac{m}{s} \left[ \sum_{(j,k): (i,j,k) \in S} \sum_{y,z} q_{ijk}(x, y, z) + \sum_{(j,k): (j,i,k) \in S} \sum_{y,z} q_{jik}(y, x, z) + \sum_{(j,k): (j,k,i) \in S} \sum_{y,z} q_{jki}(y, z, x) \right] - \gamma_{i,x}. \quad (13)$$

## B More Experimental Details

In the main paper, we omitted certain technical details about our experiments. For completeness, we shall furnish them here.

| Synthetic Data — Statistics for the largest ( $N = 10,000$ ) networks |           |           |                        |                            |                 |           |
|-----------------------------------------------------------------------|-----------|-----------|------------------------|----------------------------|-----------------|-----------|
| Network                                                               | Nodes $N$ | Edges $M$ | Degree mean/median/max | 2,3-Tris ( $\delta = 50$ ) | Frac. of 3-Tris | Roles $K$ |
| MMSB easy                                                             | 10K       | 279K      | 55.9/56/81             | 11.0M                      | 0.060           | 100       |
| MMSB hard                                                             | 10K       | 282K      | 56.4/56/85             | 11.2M                      | 0.047           | 100       |
| Power-Law easy                                                        | 10K       | 200K      | 40/41/126              | 5.2M                       | 0.31            | 100       |
| Power-Law hard                                                        | 10K       | 200K      | 40/39/176              | 5.5M                       | 0.23            | 100       |

Table 1: **Synthetic Data Experiments.** Statistics for the largest ( $N = 10,000$ ) networks.

## B.1 Generating Synthetic Data

**Latent Space Models.** We use two latent space models as the basis for our experiments — the MMSB model (Airoldi et al., 2009) (which the MMSB batch variational algorithm solves for), and a model that produces power-law networks from a latent space. A description of both models follows:

1. **MMSB:** Let  $B$  be a  $K \times K$  symmetric block matrix, the probability of an edge from  $i$  to  $j$  is  $\theta_i^T B \theta_j$ . We symmetrize the resulting network, converting all directed edges into undirected ones.
2. **Power-Law latent space model:** Let  $M$  be the number of edges in the network. We generate all  $M$  edges by repeating the following procedure: (a) pick a vertex  $i$  with probability proportional to its degree; (b) draw a destination role  $x \sim \text{Discrete}(\theta_i)$ ; (c) find the set  $V_x$  of all vertices  $v$  such that  $\theta_{vx}$  is the largest element of  $\theta_v$  (breaking ties at random); (d) within  $V_x$ , pick the destination vertex  $j$  with probability proportional to its degree, and generate the undirected edge  $(i, j)$ . If  $(i, j)$  is already present, we repeat the procedure.

The MMSB model produces networks with “blocks” of nodes characterized by *high edge probabilities*, whereas the Power-law model produces “communities” centered around a *high-degree* hub node. We show that our algorithm rapidly and accurately recovers latent space roles based on these two notions of node-relatedness.

**Ground Truth Role Vectors.** For both models, we synthesized ground truth role vectors  $\theta_i$ ’s to generate networks of varying difficulty. We generated networks with  $N \in \{500, 1000, 2000, 5000, 10000\}$  nodes, with the number of roles growing as  $K = N/100$  (i.e. linear in  $N$ ). We set the ground truth  $\theta_i$ ’s as follows: first, we divided the nodes into  $K$  groups of size 100. For the  $x$ -th group, we set 90 vectors  $\theta_i$ ’s to have mass 1 in role  $x$ , i.e.  $\theta_{ix} = 1$ . The remaining 10 vectors  $\theta_i$ ’s were set to have mass 0.5 in role  $x$ , and 0.5 in another randomly chosen role. This forms a latent space where 90% of the nodes have pure-membership, and 10% have mixed-membership between 2 roles. We call these networks “MMSB easy” and “Power-Law easy”, respectively.

We also created a second, more challenging series of networks (we call them “hard”) using role vectors with heavier mixing. These roles were constructed as follows: for the  $x$ -th group, we set 80 vectors  $\theta_i$ ’s to have mass 1 in role  $x$ , 10 vectors  $\theta_i$ ’s to have 0.5 mass in role  $x$  and 0.5 mass in 1 other random role, and 10 vectors  $\theta_i$ ’s to have 0.25 mass in role  $x$  and 0.25 mass in 3 other random roles. The resulting latent space has nodes with up to 4 roles.

In total, we generated 20 networks: 5 sizes  $\times$  2 models  $\times$  2 sets of role vectors; summary statistics for the 4 largest  $N = 10,000$  networks can be found in Table 1. For networks under the Power-Law model, we generated  $M = 20N$  edges (so the average degree is 40). As for networks under the MMSB model, we used a block matrix  $B$  with diagonal elements set to 0.2, and off-diagonal elements set to 0.001. Under this  $B$ , the ratio of intra-role to inter-role edges decreases as  $(N, K)$  increase — from approximately 20 : 1 at  $(N = 1000, K = 10)$ , to 2 : 1 at  $(N = 10000, K = 100)$ . In this sense, the amount of noise increases as the network gets larger, making membership recovery harder.
